# Supplementary material
Source: publisher figshare collection journal article supplement (https://asha.figshare.com/articles/dataset/_/7283459)
Supplement: Supplementary file 1 [file 1]

**Supplemental Material S1.** Example illustration paired with target sentences.

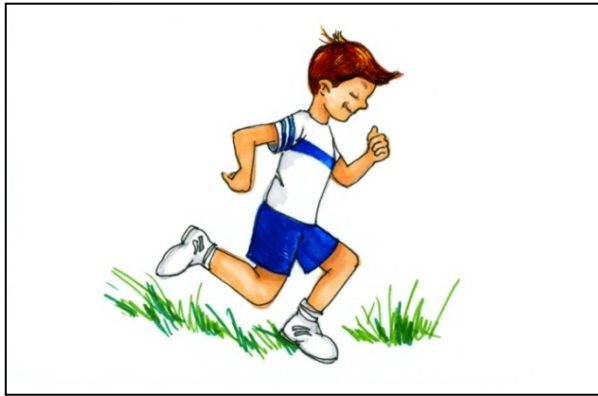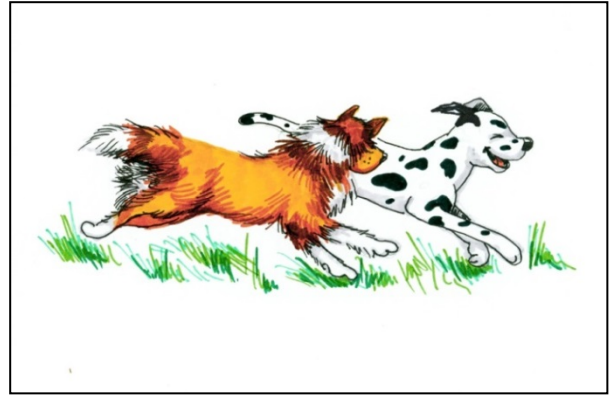

- a. T/A Cue-Plural: Are the nice little dogs running?
- b. T/A Cue-Singular: Is the nice little boy running?
- c. No T/A Cue-Singular: See the nice little boy running?
- d. No T/A Cue-Plural: See the nice little dogs running?

Artwork Copyright © 2015 Stephanie Funcheon. Reprinted with permission.
