# Supplementary material
Source: publisher figshare collection journal article supplement (https://asha.figshare.com/articles/dataset/_/7283459)
Supplement: Supplementary file 2 [file 1]

**Supplemental Material S2.** Sentences used in the experimental task.

Is/Are the nice little cat/s running?  
See the nice little cat/s running?

Is/Are the nice little dog/s running?  
See the nice little dog/s running?

Is/Are the nice little girl/s running?  
See the nice little girl/s running?

Is/Are the nice little boy/s running?  
See the nice little boy/s running?

Is/Are the nice little cat/s eating?  
See the nice little cat/s eating?

Is/Are the nice little dog/s eating?  
See the nice little dog/s eating?

Is/Are the nice little girl/s eating?  
See the nice little girl/s eating?

Is/Are the nice little boy/s eating?  
See the nice little boy/s eating?
